# Supplementary material for: Bipolar π-conjugation interrupted host polymers by metal-free superacid-catalyzed polymerization for single-layer electrophosphorescent diodes
Source: Royal Society of Chemistry journal article supplement (doi:10.1039/c4ra06540a), 2014-01-01

## Supporting information

### Bipolar $\pi$ -Conjugation Interrupted Host Polymers by Metal-Free Superacid-catalyzed Polymerization for Single-layer Electrophosphorescent Diodes

Bing Chen,<sup>\*a</sup> Zhanhai Xiao,<sup>b</sup> Yanhu Li,<sup>c</sup> Lei Yu,<sup>c</sup> Wei Yang<sup>\*c</sup> and Jiwen Feng<sup>\*a</sup>

<sup>a</sup> State Key Laboratory of Magnetic Resonance and Atomic and Molecular Physics,

Wuhan Institute of Physics and Mathematics, Chinese Academy of Science, Wuhan 430071, People's Republic of China

<sup>b</sup> School of materials science and engineering, Wuhan University of Technology, Wuhan 430070, People's Republic of China

<sup>c</sup> Institute of Polymer Optoelectronic Materials and Devices, South China University of Technology, Key Laboratory of Special Functional Materials, Ministry of Education, Guangzhou 510640, People's Republic of China

Fig. S1 DSC curves of the polymers at a heating rate of 10 °C min<sup>-1</sup>.

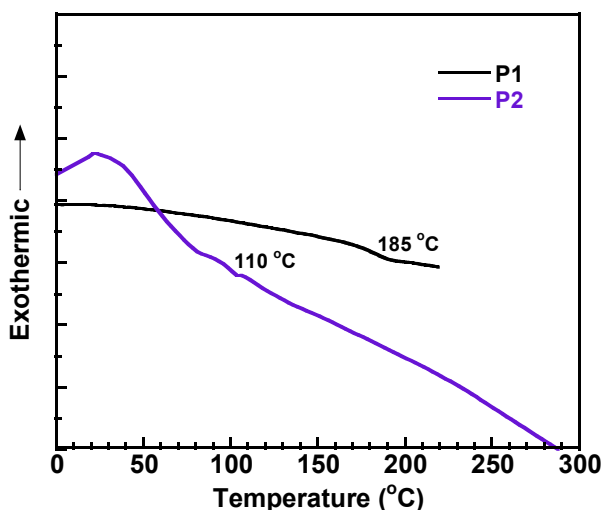

Fig. S2 Absorption spectra of M2 and P2 in dilute CH<sub>2</sub>Cl<sub>2</sub> solution.

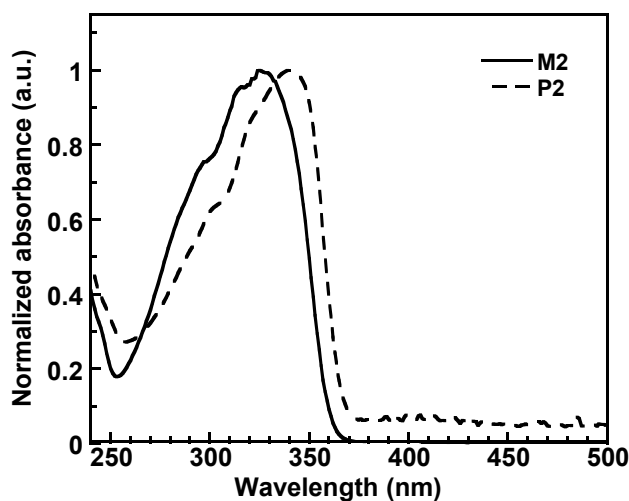

Fig. S3  $^1\text{H}$  NMR of M1 in  $\text{CDCl}_3$ .

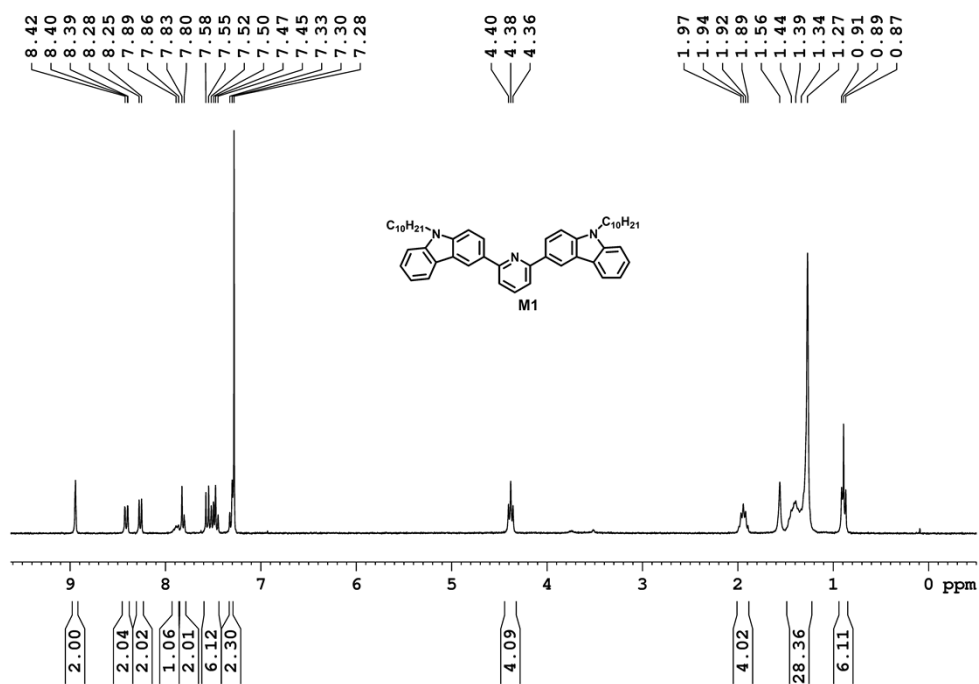

Fig. S4  $^1\text{H}$  NMR of P1 in  $\text{CDCl}_3$ .

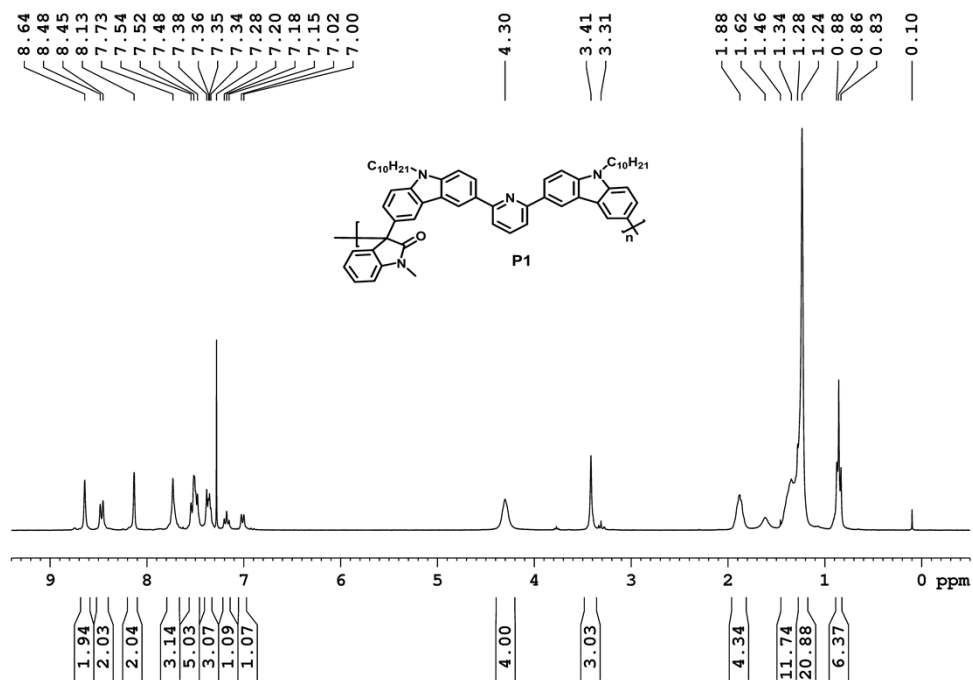

Fig. S5  $^1\text{H}$  NMR of M2 in  $\text{CDCl}_3$ .

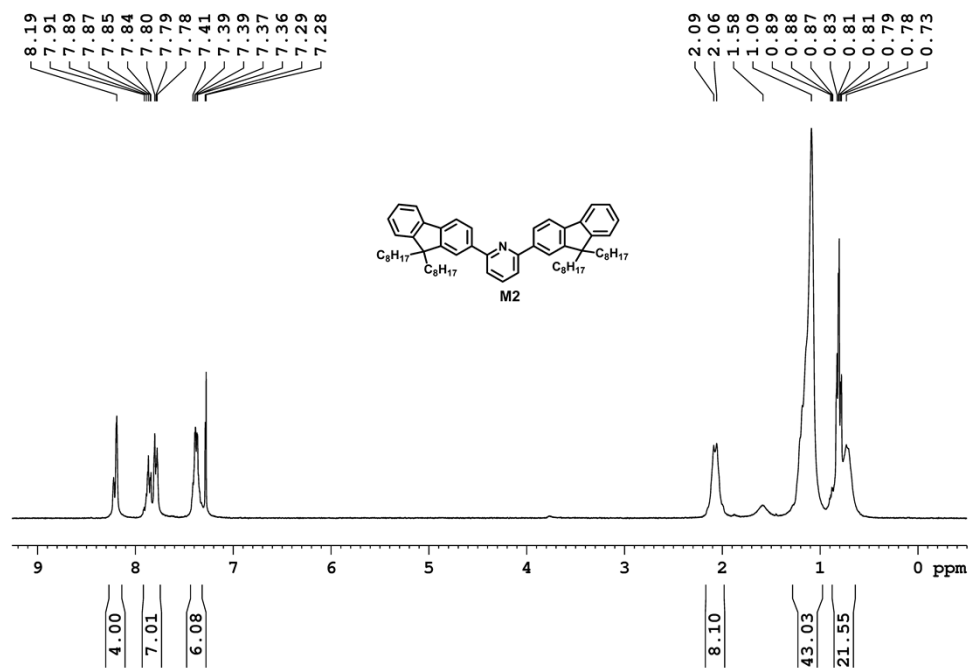

Fig. S6  $^1\text{H}$  NMR of P2 in  $\text{CDCl}_3$ .

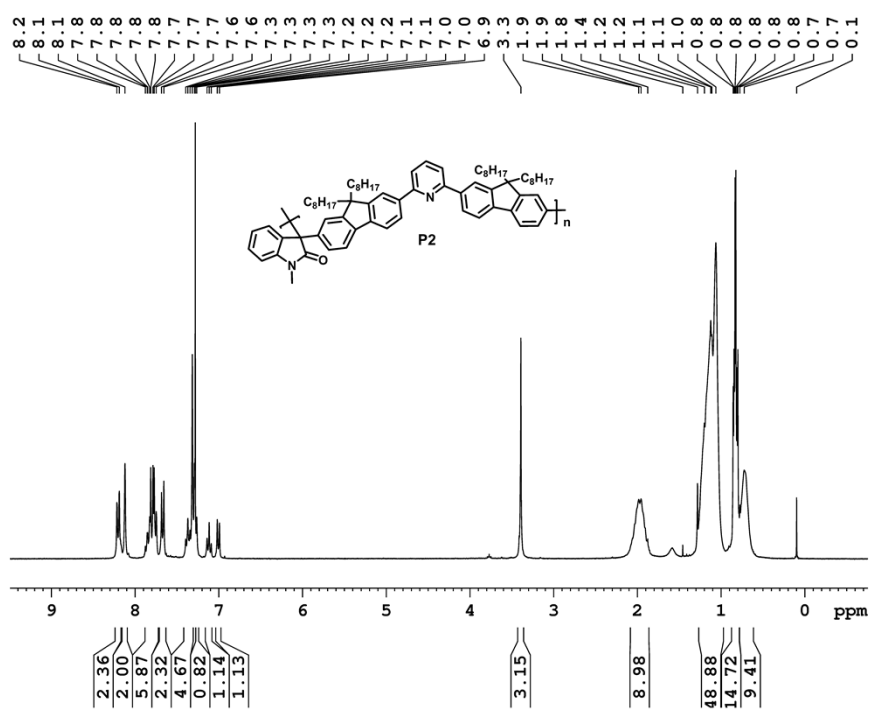

Supplement: c4ra06540a1.pdf [file c4ra06540a1.pdf]
